# Supplementary material
Source: PubMed Central journal article supplement (PMC10402916)
Supplement: NIHMS1904688-supplement-1.pdf [file NIHMS1904688-supplement-1.pdf]

# **SUPPLEMENTARY MATERIALS**

## **Integration of clinical sequencing and immunohistochemistry for the molecular classification of endometrial carcinoma**

Rios-Doria et al.

Supplementary Figures S1 – S4

Supplementary Tables S1 - S5

## Supplementary Figure S1

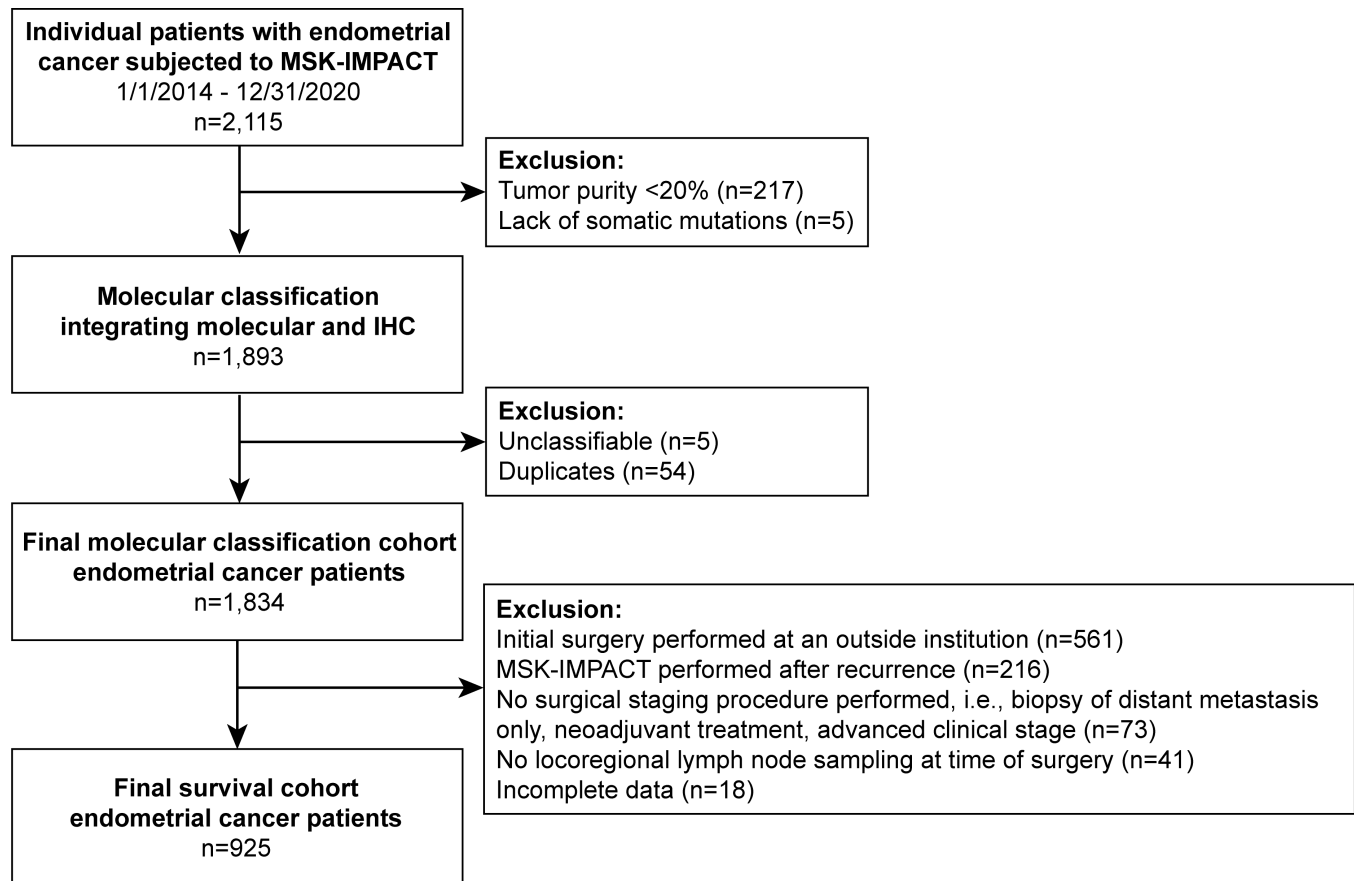

### Supplementary Figure S1. CONSORT diagram summarizing the endometrial cancer patients included in the survival analyses.

Cases were eligible for inclusion in the analyses of clinical outcomes if MSK-IMPACT was performed prior to a documented recurrence and if treatment planning with upfront surgical staging was performed at our institution.

## Supplementary S2

**A**

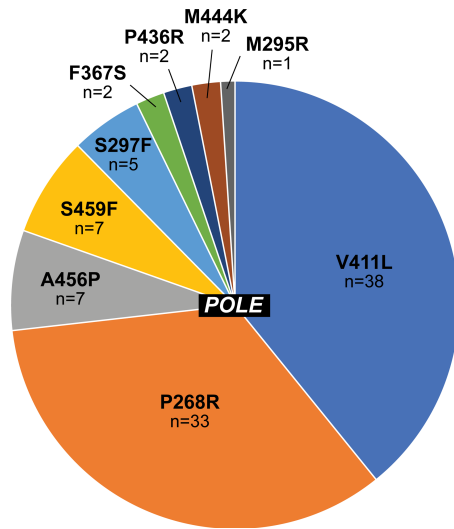

**B**

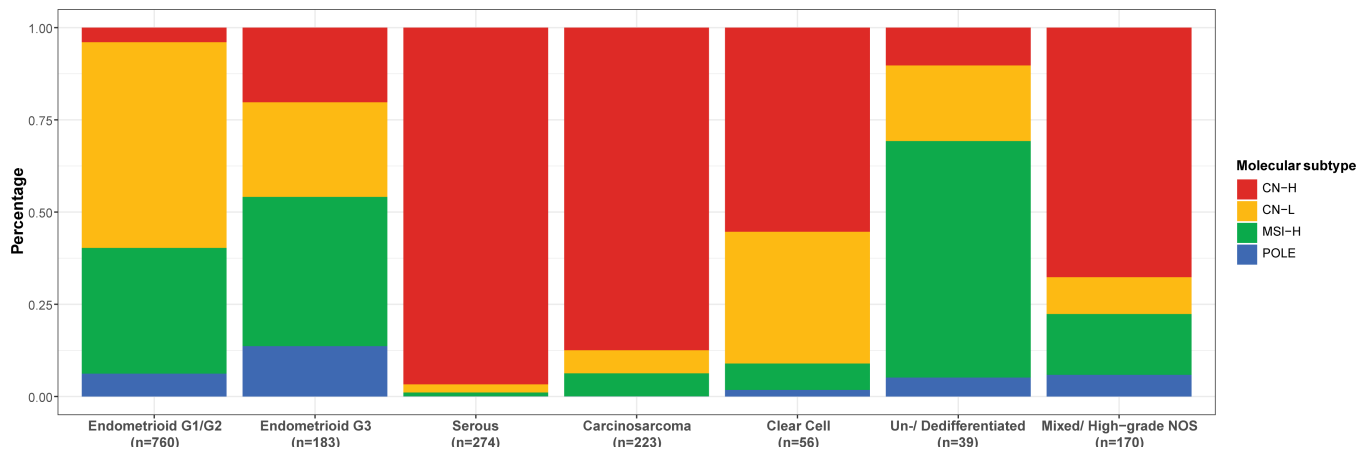

**Supplementary Figure S2: Distribution of *POLE* mutations and of molecular subtypes across endometrial cancer histologic types defined using an integrated clinical sequencing - immunohistochemistry approach.**

**A**, Prevalence of somatic *POLE* exonuclease domain hotspot mutations identified in endometrial cancers subjected to clinical tumor-normal sequencing; **B**, Distribution of molecular subtypes across histologic subtypes of endometrial cancer.

CN-H, copy number-high; CN-L, copy number-low; MSI-H, microsatellite instability-high; NOS, not otherwise specified.

## Supplementary Figure S3

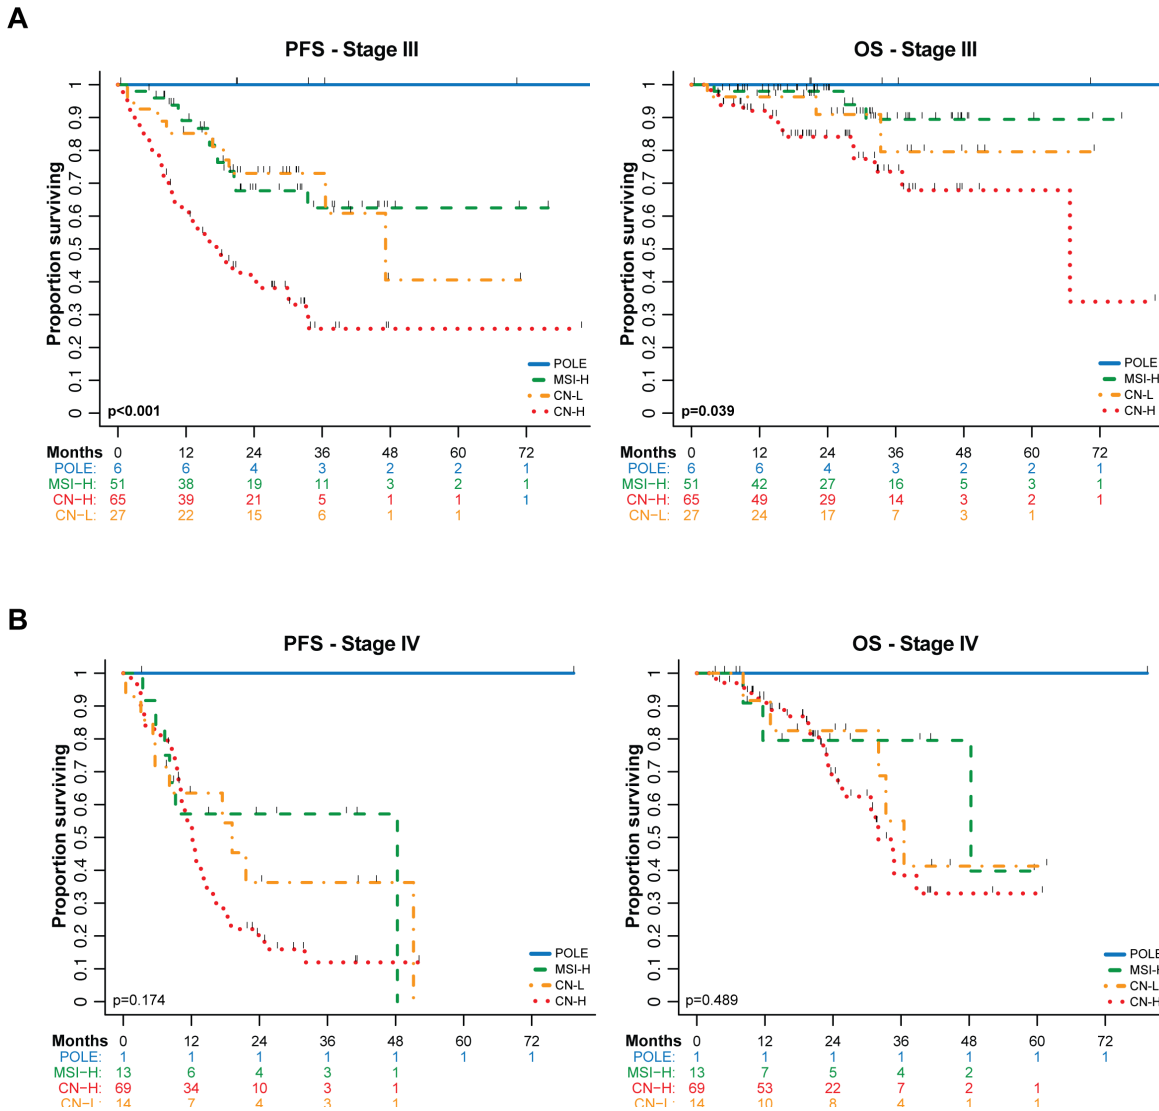

### Supplementary Figure S3. Survival outcomes of endometrial cancer patients with stage III and IV disease by molecular subtype.

Survival was assessed in patients with endometrial cancer of all histologic types whose tumors were subjected to MSK-IMPACT prior to recurrence, had upfront surgery, were surgically staged, and had surgery performed at our institution. **A.** Kaplan-Meier curves comparing progression-free survival (PFS) and overall survival (OS) in all endometrial cancer patients with stage III disease by molecular subtype. **B.** PFS and OS of endometrial cancer patients with stage IV disease by molecular subtype. Survival compared with log-rank test. p-values defined excluding the *POLE* molecular subtype due to the lack of events. CN-H, copy number-high; CN-L, copy number-low; MSI-H, microsatellite instability-high.

### Supplementary Figure S4

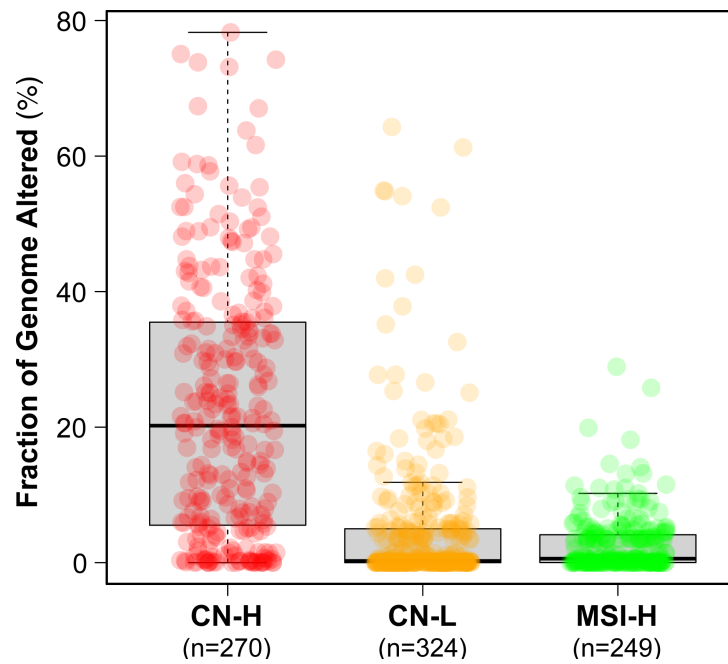

### Supplementary Figure S4. Fraction of genome altered in endometrial cancers of different molecular subtypes.

The fraction of genome altered inferred from MSK-IMPACT sequencing of copy number-high (CN-H), copy number-low (CN-L) and microsatellite instability-high (MSI-H) endometrial cancers of the survival cohort (n=925) is shown.

**Supplementary Table S1.** Agreement between our integrated clinical sequencing – immunohistochemistry-based approach and the ProMisE algorithm for molecular classification of endometrial cancers.

|                                       | <b>Integrated clinical sequencing and immunohistochemistry</b> |             |              |             |                                                   |              |
|---------------------------------------|----------------------------------------------------------------|-------------|--------------|-------------|---------------------------------------------------|--------------|
| <b>ProMisE</b>                        | <b>CN-H</b>                                                    | <b>CN-L</b> | <b>MSI-H</b> | <b>POLE</b> | <b>Unclassified</b>                               | <b>Total</b> |
| <b>CN-H</b>                           | 365                                                            | 0           | 2            | 0           | 0                                                 | 367          |
| <b>CN-L</b>                           | 25                                                             | 324         | 6            | 0           | 0                                                 | 355          |
| <b>MSI-H</b>                          | 0                                                              | 0           | 389          | 0           | 0                                                 | 389          |
| <b>POLE</b>                           | 0                                                              | 0           | 0            | 97          | 0                                                 | 97           |
| <b>Unclassified</b>                   | 344                                                            | 251         | 31           | 0           | 0                                                 | 626          |
| <b>Total</b>                          | 734                                                            | 575         | 428          | 97          | 0                                                 | <b>1,834</b> |
|                                       |                                                                |             |              |             | <b>Cohen's Kappa</b><br>0.555, 95% CI 0.531-0.579 |              |
| <b>ProMisE (without unclassified)</b> | <b>CN-H</b>                                                    | <b>CN-L</b> | <b>MSI-H</b> | <b>POLE</b> | <b>Total</b>                                      |              |
| <b>CN-H</b>                           | 365                                                            | 0           | 2            | 0           | 367                                               |              |
| <b>CN-L</b>                           | 25                                                             | 324         | 6            | 0           | 355                                               |              |
| <b>MSI-H</b>                          | 0                                                              | 0           | 389          | 0           | 389                                               |              |
| <b>POLE</b>                           | 0                                                              | 0           | 0            | 97          | 97                                                |              |
| <b>Total</b>                          | 390                                                            | 324         | 397          | 97          | <b>1,208</b>                                      |              |
|                                       |                                                                |             |              |             | <b>Cohen's Kappa</b><br>0.962, 95% CI 0.949-0.975 |              |

CI, confidence interval; CN-H, copy number-high; CN-L, copy number-low; MSI-H, microsatellite instability-high.

**Supplementary Table S2.** Distribution of histology, stage, and molecular subtype amongst primary and recurrent endometrial cancers subjected to MSK-IMPACT sequencing and molecular subtyping.

|                                  | Primary Tumor<br>n=1,501 | Recurrent Tumor<br>n=323 | p value          |
|----------------------------------|--------------------------|--------------------------|------------------|
| <b>Histology, n (%)</b>          |                          |                          | 0.24             |
| Endometrioid                     | 815 (54)                 | 161 (50)                 |                  |
| Serous                           | 216 (14)                 | 58 (18)                  |                  |
| Clear Cell                       | 43 (3)                   | 13 (4)                   |                  |
| Carcinosarcoma                   | 181 (12)                 | 42 (13)                  |                  |
| Dediff./ Undiff.                 | 35 (2)                   | 4 (1)                    |                  |
| Mixed/ high-grade NOS            | 144 (10)                 | 26 (8)                   |                  |
| Other                            | 67 (5)                   | 19 (6)                   |                  |
| <b>Endometrioid Grade, n (%)</b> | 418 (53)                 | 55 (37)                  | <b>&lt;0.001</b> |
| 1                                | 224 (28)                 | 63 (43)                  |                  |
| 2                                | 153 (19)                 | 30 (20)                  |                  |
| 3                                |                          |                          |                  |
| <b>Stage, n (%)</b>              |                          |                          | 0.09             |
| I                                | 804 (59)                 | 152 (54)                 |                  |
| II                               | 53 (4)                   | 19 (7)                   |                  |
| III                              | 275 (20)                 | 66 (23)                  |                  |
| IV                               | 241 (18)                 | 47 (17)                  |                  |
| <b>Molecular Subtype, n (%)</b>  |                          |                          | <b>&lt;0.001</b> |
| POLE                             | 93 (6)                   | 3 (1)                    |                  |
| MSI-H                            | 355 (24)                 | 73 (23)                  |                  |
| CN-H                             | 590 (39)                 | 139 (43)                 |                  |
| CN-L                             | 463 (31)                 | 108 (33)                 |                  |

CN-H, copy number-high; CN-L, copy number-low; MSI-H, microsatellite instability-high; NOS, not otherwise specified.

**Supplementary Table S3.** Clinico-pathologic and molecular characteristics of endometrial cancers according to molecular subtype for the survival cohort (n=925).

|                                                     | Total            | POLE<br>n=82       | MSI-H<br>n=249   | CN-H<br>n=270    | CN-L<br>n=324    | p value*         |
|-----------------------------------------------------|------------------|--------------------|------------------|------------------|------------------|------------------|
| <b>Histology, n (%)</b>                             |                  |                    |                  |                  |                  | <b>&lt;0.001</b> |
| Endometrioid                                        | 595              | 68 (83)            | 200 (80)         | 32 (12)          | 295 (91)         |                  |
| Serous                                              | 85               | 0                  | 2 (0.8)          | 82 (30)          | 1 (0.3)          |                  |
| Clear Cell                                          | 24               | 1 (1.2)            | 3 (1.2)          | 11 (4.1)         | 9 (2.8)          |                  |
| Carcinosarcoma                                      | 90               | 0                  | 9 (3.6)          | 78 (29)          | 3 (0.9)          |                  |
| De-/ Undifferentiated                               | 21               | 1 (1.2)            | 16 (6.4)         | 1 (0.4)          | 3 (0.9)          |                  |
| Mixed/ high-grade NOS                               | 85               | 8 (9.8)            | 18 (7.2)         | 49 (18)          | 10 (3.1)         |                  |
| Other                                               | 25               | 4 (4.9)            | 1 (0.4)          | 17 (6.3)         | 3 (0.9)          |                  |
| <b>Endometrioid Grade, n (%)</b>                    |                  |                    |                  |                  |                  | <b>&lt;0.001</b> |
| 1                                                   | 333              | 23 (35)            | 84 (43)          | 12 (40)          | 214 (73)         |                  |
| 2                                                   | 166              | 20 (30)            | 77(39)           | 2 (7)            | 67 (23)          |                  |
| 3                                                   | 87               | 23 (35)            | 36 (18)          | 16 (53)          | 12 (4)           |                  |
| <b>Stage, n (%)</b>                                 |                  |                    |                  |                  |                  | <b>&lt;0.001</b> |
| I                                                   | 643              | 72 (88)            | 173 (69)         | 121 (45)         | 277 (85)         |                  |
| II                                                  | 36               | 3 (3.7)            | 12 (4.8)         | 15 (5.6)         | 6 (1.9)          |                  |
| III                                                 | 149              | 6 (7.3)            | 51 (20)          | 65 (24)          | 27 (8.3)         |                  |
| IV                                                  | 97               | 1 (1.2)            | 13 (5.2)         | 69 (26)          | 14 (4.3)         |                  |
| <b>Adjuvant Treatment<sup>†</sup>, n (%)</b>        |                  |                    |                  |                  |                  | <b>&lt;0.001</b> |
| None                                                | 353              | 30 (37)            | 89 (36)          | 32 (12)          | 202 (62)         |                  |
| Chemo +/- RT                                        | 381              | 18 (22)            | 95 (38)          | 210 (78)         | 58 (18)          |                  |
| RT                                                  | 191              | 34 (41)            | 65 (26)          | 28 (10)          | 64 (20)          |                  |
| <b>Surgical Approach, n (%)</b>                     |                  |                    |                  |                  |                  | <b>&lt;0.001</b> |
| MIS                                                 | 758              | 69 (84)            | 212 (85)         | 185 (69)         | 292 (90)         |                  |
| Open                                                | 167              | 13 (16)            | 37 (15)          | 85 (31)          | 32 (10)          |                  |
| <b>Age at diagnosis, n (%)</b>                      |                  |                    |                  |                  |                  | <b>&lt;0.001</b> |
| < 60                                                | 343              | 54 (66)            | 93 (37)          | 51 (19)          | 145 (45)         |                  |
| ≥ 60                                                | 582              | 28 (34)            | 156 (63)         | 219 (81)         | 179 (55)         |                  |
| <b>BMI kg/m<sup>2</sup>, (median, range)</b>        | 30.4 (16.9-67.6) | 26.3 (17.7-41.1)   | 30.3 (16.9-58.0) | 29.8 (17.7-51.1) | 32.5 (17.8-67.6) | <b>&lt;0.001</b> |
| <b>TMB (mutations/Mb), median (range)</b>           | 7.0 (0.0-558.2)  | 135.2 (19.3-558.2) | 29.8 (0.0-397.9) | 4.4 (0.9-74.6)   | 6.1 (0.0-57.1)   | <b>&lt;0.001</b> |
| <b>Tumor Purity (%)</b> , median (range)            | 40 (20-90)       | 40 (20-85)         | 40 (20-90)       | 50 (20-90)       | 30 (20-90)       | <b>&lt;0.001</b> |
| <b>Somatic Mutations (n)</b> , median (range)       | 8 (1-634)        | 150 (22-634)       | 34 (1-483)       | 5 (1-85)         | 7 (1-65)         | <b>&lt;0.001</b> |
| <b>Fraction genome altered (%)</b> , median (range) | 1.5 (0.0-78.3)   | 0.1 (0.0-10.9)     | 0.6 (0.0-28.9)   | 20.2 (0.0-78.3)  | 0.2 (0.0-64.3)   | <b>&lt;0.001</b> |
| <b>MSIsensor score</b> , median (range)             | 0.2 (0.0-41.9)   | 0.2 (0.0-20.1)     | 13.1 (0.0-41.9)  | 0.3 (0.0-4.2)    | 0.0 (0.0-7.7)    | <b>&lt;0.001</b> |

\* Kruskal-Wallis rank sum test; Fisher's exact test; Fisher's Exact Test for Count Data with simulated p-value (based on 2000 replicates)

† Adjuvant treatment: none, chemotherapy with or without radiation therapy, radiation therapy alone

BMI, body mass index; Chemo, chemotherapy; CN-H, copy number-high; CN-L, copy number-low; MIS, minimally invasive surgery; MSI-H, microsatellite instability-high; RT, radiotherapy; TMB, tumor mutational burden.



**Supplementary Table S4.** Univariate and multivariate analysis on progression-free survival for patients meeting survival criteria (n=925).

|                                                | Total | Univariate HR <sup>1</sup> (95% CI) | p-value <sup>2</sup> | Multivariate HR (95% CI) | p-value          |
|------------------------------------------------|-------|-------------------------------------|----------------------|--------------------------|------------------|
| <b>Molecular Classification</b>                |       |                                     | <b>&lt;0.001</b>     |                          | <b>0.005</b>     |
| POLE                                           | 82    | 1                                   |                      | -                        |                  |
| MSI-H                                          | 249   | 7.25 (1.75-30.06)                   |                      | 4.76 (1.14-19.9)         |                  |
| CN-H                                           | 270   | 25.96 (6.42-104.94)                 |                      | 7.87 (1.85-33.4)         |                  |
| CN-L                                           | 324   | 4.7 (1.12-19.63)                    |                      | 3.84 (0.91-16.2)         |                  |
| <b>Age (years)</b>                             |       |                                     | <b>&lt;0.001</b>     |                          | <b>0.002</b>     |
| < 60                                           | 343   | 1                                   |                      | -                        |                  |
| ≥ 60                                           | 582   | 2.47 (1.76-3.47)                    |                      | 1.75 (1.22-2.50)         |                  |
| <b>Stage</b>                                   |       |                                     | <b>&lt;0.001</b>     |                          | <b>&lt;0.001</b> |
| I                                              | 643   | 1                                   |                      | -                        |                  |
| II                                             | 36    | 1.43 (0.57-3.56)                    |                      | 1.13 (0.44-2.86)         |                  |
| III                                            | 149   | 4.82 (3.4-6.84)                     |                      | 4.23 (2.77-6.44)         |                  |
| IV                                             | 97    | 11.09 (7.85-15.66)                  |                      | 7.13 (4.63-11.0)         |                  |
| <b>Histology</b>                               |       |                                     | <b>&lt;0.001</b>     |                          | <b>0.014</b>     |
| Endometrioid                                   | 595   | 1                                   |                      | -                        |                  |
| Non-Endometrioid                               | 330   | 4.69 (3.46-6.36)                    |                      | 1.78 (1.12-2.82)         |                  |
| <b>Adjuvant Treatment<sup>3</sup></b>          |       |                                     | <b>&lt;0.001</b>     |                          | 0.44             |
| None                                           | 348   | 1                                   |                      | -                        |                  |
| Chemo +/- RT                                   | 379   | 4.03 (2.72-5.96)                    |                      | 0.74 (0.45-1.19)         |                  |
| RT                                             | 191   | 1.04 (0.58-1.84)                    |                      | 0.92 (0.51-1.65)         |                  |
| <b>Surgical Approach</b>                       |       |                                     | <b>&lt;0.001</b>     |                          | 0.85             |
| Minimally Invasive                             | 758   | 1                                   |                      | -                        |                  |
| Open                                           | 167   | 2.15 (1.59-2.91)                    |                      | 1.03 (0.74-1.44)         |                  |
| <b>BMI, kg/m<sup>2</sup> (5 unit increase)</b> |       | 0.99 (0.91-1.08)                    | 0.884                | -                        | -                |

<sup>1</sup> HR = Hazard ratio, CI = confidence interval

<sup>2</sup> p-value obtained by applying Log-rank Test for categorical variables and Wald test based on Cox-Proportional Hazard model for continuous variables; p-value obtained by applying permutation Log-Rank test with 5000 permutation times if events count < 3.

BMI, body mass index; Chemo, chemotherapy; CN-H, copy number-high; CN-L, copy number-low; MSI-H, microsatellite instability-high; RT, radiotherapy.

**Supplementary Table S5.** Clinico-pathologic characteristics by molecular subtypes for stage I/II endometrioid endometrial carcinoma.

|                                  | Total | POLE<br>n=61 | MSI-H<br>n=152 | CN-H<br>n=23 | CN-L<br>n=266 | p value          |
|----------------------------------|-------|--------------|----------------|--------------|---------------|------------------|
| <b>Endometrioid Grade, n (%)</b> |       |              |                |              |               | <b>&lt;0.001</b> |
| 1                                | 302   | 21 (36)      | 71 (47)        | 12 (57)      | 198 (75)      |                  |
| 2                                | 130   | 18 (31)      | 53 (35)        | 2 (10)       | 57 (22)       |                  |
| 3                                | 63    | 20 (34)      | 26 (17)        | 7 (33)       | 10 (4)        |                  |
| <b>Stage, n (%)</b>              |       |              |                |              |               | 0.028            |
| I                                | 456   | 58 (95)      | 145 (95)       | 20 (87)      | 261 (98)      |                  |
| II                               | 18    | 3 (5)        | 7 (5)          | 3 (13)       | 5 (2)         |                  |
| <b>LVSI, n (%)</b>               |       |              |                |              |               | <b>&lt;0.001</b> |
| Negative                         | 399   | 40 (66)      | 111 (73)       | 18 (78)      | 230 (86)      |                  |
| Positive                         | 94    | 21 (34)      | 37 (24)        | 5 (22)       | 31 (12)       |                  |
| Suspicious/ Unknown              | 9     | 0            | 4 (3)          | 0            | 5 (2)         |                  |
| <b>Cytology, n (%)</b>           |       |              |                |              |               | 0.78             |
| Negative                         | 430   | 50 (82)      | 130 (86)       | 20 (87)      | 230 (86)      |                  |
| Positive                         | 34    | 4 (6.6)      | 13 (9.6)       | 1 (4)        | 16 (6)        |                  |
| Suspicious/ Unknown              | 38    | 7 (11)       | 9 (5.9)        | 2 (9)        | 20 (8)        |                  |
| <b>Depth of Invasion, n (%)</b>  |       |              |                |              |               | <b>&lt;0.001</b> |
| None                             | 253   | 18 (30)      | 57 (38)        | 11 (48)      | 167 (63)      |                  |
| < 50%                            | 169   | 33 (54)      | 66 (43)        | 7 (30)       | 63 (24)       |                  |
| ≥ 50%                            | 80    | 10 (16)      | 29 (19)        | 5 (22)       | 36 (14)       |                  |
| <b>Adjuvant Treatment, n (%)</b> |       |              |                |              |               | <b>&lt;0.001</b> |
| Chemo +/- RT                     | 47    | 6 (10)       | 22 (14)        | 4 (17)       | 15 (6)        |                  |
| RT                               | 144   | 27 (44)      | 54 (36)        | 6 (26)       | 57 (21)       |                  |
| None                             | 311   | 28 (46)      | 76 (50)        | 13 (57)      | 194 (73)      |                  |
| <b>Surgical Approach, n (%)</b>  |       |              |                |              |               | 0.14             |
| Minimally invasive               | 456   | 51 (84)      | 139 (91)       | 20 (87)      | 246 (92)      |                  |
| Open                             | 46    | 10 (16)      | 13 (9)         | 3 (13)       | 20 (8)        |                  |
| <b>Age, n (%)</b>                |       |              |                |              |               | <b>&lt;0.001</b> |
| < 60 years                       | 234   | 41 (67)      | 56 (37)        | 10 (43)      | 127 (48)      |                  |
| ≥ 60 years                       | 268   | 20 (33)      | 96 (63)        | 13 (57)      | 139 (52)      |                  |
| <b>Recurrence Site, n (%)</b>    |       |              |                |              |               | 0.90             |
| Locoregional                     | 19    | 2 (100)      | 7 (64)         | 4 (80)       | 6 (86)        |                  |
| Distant                          | 6     | 0            | 4 (36)         | 1 (20)       | 1 (14)        |                  |

Chemo, chemotherapy; CN-H, copy number-high; CN-L, copy number-low; LVSI, lymphovascular space invasion; MSI-H, microsatellite instability-high; RT, radiotherapy.
